# Supplementary material
Source: publisher site journal article supplement (https://www.dovepress.com/article/282880)
Supplement: Supplementary file 1 [file get_supplementary_file.php]

Figure S1: Staphylococcus aureus colonization prevalence by age and sex.

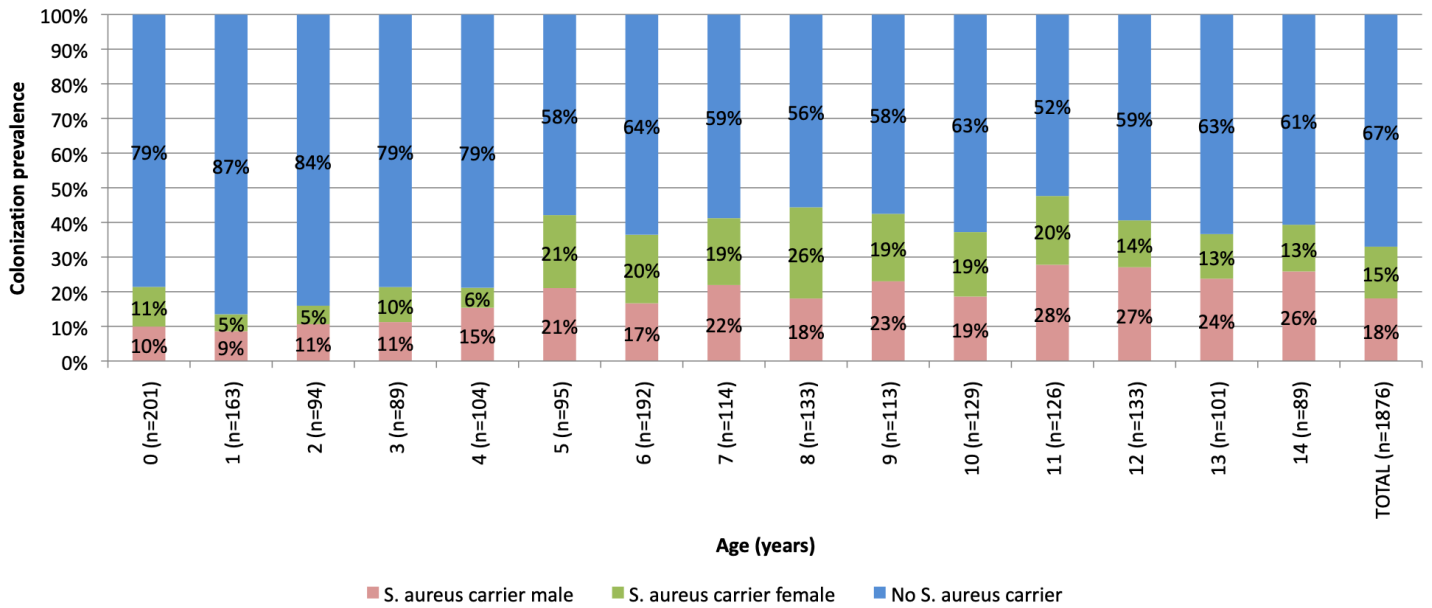

Figure S2: Antibiotic susceptibility results of all S. aureus

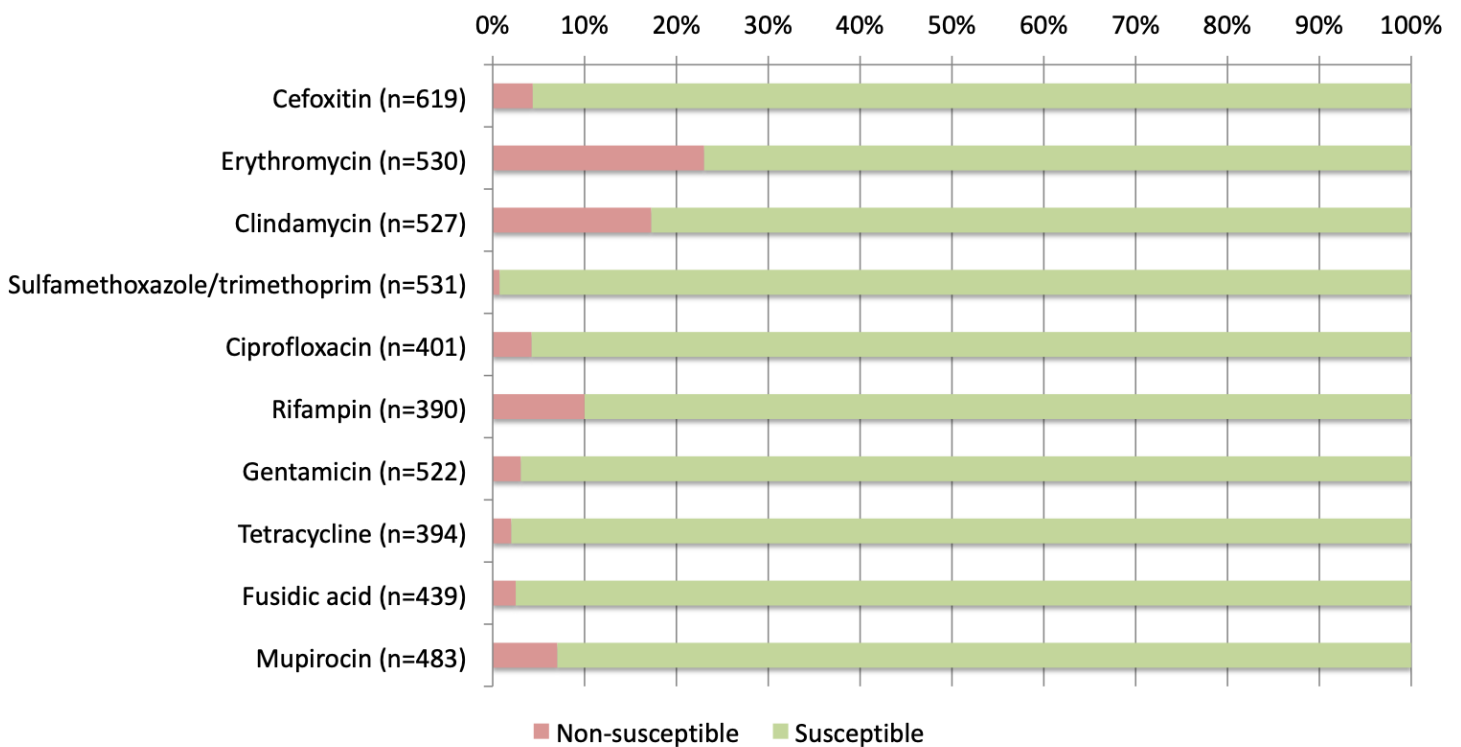

**Table S1: Epidemiological data regarding MRSA colonization.**

| Variable                                                                   |                | n (%) or mean (SD)            | Magnitude (95% CI)                     |
|----------------------------------------------------------------------------|----------------|-------------------------------|----------------------------------------|
| Children colonized by MRSA (total)                                         |                | 27/1786 (1.4%) (95% CI 0.9-2) |                                        |
| Children colonized by MRSA among total of <i>S. aureus</i> colonized cases |                | 27/619 (4.4%) (95% CI 2.7-6)  |                                        |
| Age group (years)                                                          | 0-4            | 9/122 (7.4%)                  | OR 0-4 years vs 5-14: 2.12 (0.93-8.45) |
|                                                                            | 5-9            | 9/263 (3.4%)                  |                                        |
|                                                                            | 10-14          | 9/234 (3.9%)                  |                                        |
| Mean age (years)                                                           | MRSA colonized | 7.40 (4.30)                   | MD: 0.82 (-0.71 – 2.35)                |
|                                                                            | MSSA colonized | 8.22 (3.94)                   |                                        |
| Gender                                                                     | Male           | 14/339 (4.1)                  | OR: 1.13 (0.52 - 2.45)                 |
|                                                                            | Female         | 13/280 (4.6)                  |                                        |
| Child's origin                                                             | Foreign        | 1/26 (3.9)                    | OR: 0.87 (0.11-6.67)                   |
|                                                                            | Spanish        | 26/591 (4.4)                  |                                        |
| Mother's origin                                                            | Foreign        | 3/115 (2.6)                   | OR: 0.54 (0.16-1.81)                   |
|                                                                            | Spanish        | 24/502 (4.8)                  |                                        |
| Father's origin                                                            | Foreign        | 4/123 (3.3)                   | OR: 0.69 (0.23-2.03)                   |
|                                                                            | Spanish        | 23/494 (4.7)                  |                                        |
| Habitat                                                                    | Urban          | 18/538 (3.3)                  | <b>OR rural: 3.62 (1.57-8.36)*</b>     |
|                                                                            | Rural          | 9/81 (11.1)                   |                                        |
| Livestock exposure                                                         | Yes            | 4/66 (6.1)                    | OR: 1.49 (0.50-4.44)                   |
|                                                                            | No             | 23/553 (4.2)                  |                                        |
| Pets at home                                                               | Yes            | 13/284 (4.6)                  | OR: 1.09 (0.51-2.37)                   |
|                                                                            | No             | 14/333 (4.2)                  |                                        |
| School/daycare attendance                                                  | Yes            | 23/551 (4.2)                  | OR: 0.70 (0.23–2.08)                   |
|                                                                            | No             | 4/68 (5.9)                    |                                        |
| Previous antibiotic treatment                                              | Yes            | 2/28 (6.9)                    | OR: 1.68 (0.38-7.45)                   |
|                                                                            | No             | 25/588 (4.2)                  |                                        |
| Previous skin infection                                                    | Yes            | 4/136 (2.9)                   | OR: 0.60 (0.20-1.78)                   |
|                                                                            | No             | 22/455 (4.8)                  |                                        |
| Hospital admission last year                                               | Yes            | 2/26 (7.7)                    | OR: 1.98 (0.44-8.88)                   |
|                                                                            | No             | 25/591 (4.2)                  |                                        |
| Underlying chronic disease                                                 | Yes            | 11/242 (4.5)                  | OR 1.09 (0.50-2.39)                    |
|                                                                            | No             | 16/375 (4.3)                  |                                        |

Abbreviations: MRSA: methicillin-resistant *S. aureus*, MSSA: methicillin-susceptible *S. aureus*, SD: standard deviation, CI: confidence interval, OR: odds ratio, MD: mean difference.

\*Significant results are represented in bold letters.
